# Supplementary material for: Phenological Synchrony, Parental Contribution, and Pollen Dispersal Pattern affects the Genetic Composition of Cupressus funebris Dwarf Seed Orchard Progenies
Source: Research Square preprint supplement (doi:10.21203/rs.3.rs-7253675/v1), 2025-09-02
Supplement: Supplementary file 1 [file fb9d4e5d54e391083b1b7a02.docx]

**Supplementary Material**

**Table S1** Information of 12 pairs of SSR primers

| Locus | Forward Primer sequences (5′–3′) | Reverse Primer sequences(5′–3′) | Repeat motif |
| --- | --- | --- | --- |
| 1-C95 | CAAAAGTGGCTATCCTGAAGTC | ATCAAACACCTAAATGCTCCC | (GT)12 |
| C83 | GCCGTTAAAATCCAGACAGC | CGATTTCCAGTAAGCAAGGC | (GT)18 |
| CYP52 | CATCCACTGCCAATACTTTT | AGCATCTTCCCATTACTTGA | (GT)21 |
| CYP84 | CATTTCAATTTGCATAAGTTCT | GCAATGGGATGACTACAAAA | (GT)13(TC)23 |
| CYP174 | CAACCCTTCTCTTCGATAGT | ACCTTCTTTGTCATCGTCAC | (GA)21 |
| CYP293 | GGCAAGTAATGAAACTCCAC | TACAAACATGCATGGCTAAC | (GT)14 |
| F015 | TGTAATAACTCTGTCCCTTCC | CTCTGTGCTCCTCTCCAA | (TA)7 |
| F042 | TGGAAGAAGATATGGTCAAGG | TCAATAGCTGCTCTGTCAC | (GA)6 |
| JT04 | ATTCAAGGGATGAGCACAAAG | CAGGCTAATCCACACACTTCAC | (AAG)5 |
| JT05 | ACAATGTTGGTCCCTACAACAAC | GGAACACTTCCATTATTTGGATAGG | (AACAAT)5 |
| YW03 | GCTTGGTAGGCAAAGTACACC | GTGCAAGCTCAACTACACCC | (ATGT)7 |
| CF02 | ATGTTCTTGGTTTTGGTCA | CACGATGTTGATGGAGATA | (GT)7 |
